# Supplementary material
Source: PubMed Central journal article supplement (PMC8167690)
Supplement: ajcr0011-2343-f1.pdf [file ajcr0011-2343-f1.pdf]

## BMI and HNC risk

**Table S1.** Stratified analysis of association between BMI and risk of SCCHN among cases

| Characteristic     | Underweight<br>Adjusted OR (95% CI) <sup>a</sup> | Normal <sup>b</sup> Adjusted<br>OR (95% CI) <sup>a</sup> | Overweight<br>Adjusted OR (95% CI) <sup>a</sup> | Obese Adjusted<br>OR (95% CI) <sup>a</sup> |
|--------------------|--------------------------------------------------|----------------------------------------------------------|-------------------------------------------------|--------------------------------------------|
| Age, years         |                                                  | 1.0                                                      |                                                 |                                            |
| <50                | 1.7 (0.7-4.1)                                    |                                                          | 0.7 (0.5-1.0)                                   | 0.8 (0.6-1.1)                              |
| ≥50                | 23.5 (1.5-7.9)                                   | 1.0                                                      | 0.7 (0.6-0.9)                                   | 0.8 (0.6-0.9)                              |
| Sex                |                                                  |                                                          |                                                 |                                            |
| Male               | 3.4 (1.3-8.9)                                    | 1.0                                                      | 0.7 (0.6-0.8)                                   | 0.7 (0.6-0.9)                              |
| Female             | 2.1 (1.0-4.5)                                    | 1.0                                                      | 0.7 (0.5-1.0)                                   | 0.9 (0.6-1.2)                              |
| Race/ethnicity     |                                                  |                                                          |                                                 |                                            |
| Non-Hispanic white | 3.0 (1.5-5.8)                                    | 1.0                                                      | 0.8 (0.6-0.9)                                   | 0.9 (0.7-1.1)                              |
| Other              | 1.2 (0.3-4.1)                                    | 1.0                                                      | 0.4 (0.2-0.6)                                   | 0.4 (0.2-0.6)                              |
| Stage              |                                                  |                                                          |                                                 |                                            |
| I/II               | 2.2 (1.0-4.8)                                    | 1.0                                                      | 0.7 (0.5-0.8)                                   | 0.8 (0.6-1.0)                              |
| III/IV             | 2.8 (1.5-5.1)                                    | 1.0                                                      | 0.7 (0.6-0.8)                                   | 0.8 (0.6-0.9)                              |

<sup>a</sup>Unconditional logistic regression model adjusting for age, sex, race/ethnicity, smoking status, alcohol use status, tumor site, stage, and an interaction term. <sup>b</sup>Reference category.

**Table S2.** Association between BMI and HPV status in SCCOP among cases

|               | No. (%) E6/7(+)<br>(N = 402) | No. (%) E6/7(-)<br>(N = 280) | Crude OR<br>(95% CI) | Adjusted OR<br>(95% CI) <sup>a</sup> |
|---------------|------------------------------|------------------------------|----------------------|--------------------------------------|
| Underweight   | 3 (0.8)                      | 9 (3.2)                      | 0.4 (0.1-1.6)        | 0.5 (0.1-2.1)                        |
| Normal weight | 67 (16.7)                    | 83 (29.6)                    | 1.0 (Ref)            | 1.0 (Ref)                            |
| Overweight    | 149 (37.1)                   | 95 (33.9)                    | 1.9 (1.3-2.9)        | 1.7 (1.1-2.6)                        |
| Obese         | 183 (45.5)                   | 93 (33.2)                    | 2.4 (1.6-3.7)        | 2.3 (1.5-3.5)                        |

<sup>a</sup>Unconditional logistic regression model adjusting for age, sex, race/ethnicity, smoking status, alcohol use status, tumor site, stage, and an interaction term.

**Table S3.** Association between BMI and HPV E6/7 antibody serostatus among patients with SCCOP stratified by sexual behavior

| Characteristic                       | No. (%) E6/7(+)<br>(N = 479) | No. (%) E6/7(-)<br>(N = 203) | Underweight<br>Adjusted OR<br>(95% CI) <sup>a</sup> | Normal <sup>b</sup><br>Adjusted OR<br>(95% CI) <sup>a</sup> | Overweight<br>Adjusted OR<br>(95% CI) <sup>a</sup> | Obese<br>Adjusted OR<br>(95% CI) <sup>a</sup> |
|--------------------------------------|------------------------------|------------------------------|-----------------------------------------------------|-------------------------------------------------------------|----------------------------------------------------|-----------------------------------------------|
| Lifetime number of sex partner       |                              |                              |                                                     | 1.0                                                         |                                                    |                                               |
| <5                                   | 60 (28.6)                    | 34 (44.2)                    | NC <sup>b</sup>                                     |                                                             | 0.9 (0.3-3.0)                                      | 1.1 (0.3-3.4)                                 |
| ≥5                                   | 150 (71.4)                   | 43 (55.8)                    | NC <sup>b</sup>                                     | 1.0                                                         | 2.2 (1.1-5.5)                                      | 2.4 (1.0-5.9)                                 |
| Missing                              | 269                          | 126                          |                                                     |                                                             |                                                    |                                               |
| Ever oral sex                        |                              |                              |                                                     |                                                             |                                                    |                                               |
| No                                   | 12 (4.8)                     | 17 (18.5)                    | NC <sup>b</sup>                                     | 1.0                                                         | 0.7 (0.1-6.5)                                      | 1.4 (0.1-13.7)                                |
| Yes                                  | 240 (95.2)                   | 75 (81.5)                    | 0.2 (0.0-2.3)                                       | 1.0                                                         | 1.6 (1.2-3.2)                                      | 1.6 (1.1-3.2)                                 |
| Missing                              | 227                          | 111                          |                                                     |                                                             |                                                    |                                               |
| Lifetime number of oral sex partners |                              |                              |                                                     |                                                             |                                                    |                                               |
| <4                                   | 91 (44.6)                    | 42 (60.0)                    | NC <sup>b</sup>                                     | 1.0                                                         | 2.0 (0.7-5.4)                                      | 1.7 (0.7-4.6)                                 |
| ≥4                                   | 113 (55.4)                   | 28 (40.0)                    | 0.4 (0.0-7.1)                                       | 1.0                                                         | 1.9 (1.1-5.9)                                      | 2.1 (1.2-6.5)                                 |
| Missing                              | 275                          | 133                          |                                                     |                                                             |                                                    |                                               |

Reference category. <sup>a</sup>Unconditional logistic regression model adjusting for age, sex, race/ethnicity, smoking status, alcohol use status, tumor site, stage, and an interaction term. <sup>b</sup>NC: not calculable because of 0 cells (0 +controls).
